# Supplementary material for: Synthesis of mono-(p-dimethylamino)styryl-containing BOPHY dye for a turn-on pH sensor
Source: Royal Society of Chemistry journal article supplement (doi:10.1039/c4ra15914d), 2015-01-01
Supplement: c4ra15914d1.pdf [file c4ra15914d1.pdf]

## ESI

# Synthesis of mono-(*p*-dimethylamino)styryl-containing BOPHY dye for a turn-on pH sensor

Xin-Dong Jiang<sup>a,\*</sup>, Yajun Su<sup>a</sup>, Shuai Yue<sup>a</sup>, Chen Li<sup>a</sup>, Haifeng Yu<sup>a</sup>, Han Zhang<sup>b</sup>, Chang-Liang Sun<sup>c</sup> and Lin-Jiu Xiao<sup>a</sup>

|                  |    |
|------------------|----|
| 1 MO calculation | S2 |
| 2. NMR           | S7 |

**1. The geometrical coordinates of 3a and 3a-H<sup>+</sup> optimized at the MP2/6-31G\* level.**

**3a**

|   |   |           |           |           |
|---|---|-----------|-----------|-----------|
| 6 | 0 | 2.108182  | 0.868718  | -0.115875 |
| 6 | 0 | 3.367099  | 1.359353  | -0.240888 |
| 6 | 0 | 4.612487  | 0.615377  | -0.177189 |
| 6 | 0 | 5.836285  | 1.295347  | -0.330969 |
| 6 | 0 | 7.059518  | 0.644843  | -0.277642 |
| 6 | 0 | 7.128123  | -0.753185 | -0.068162 |
| 6 | 0 | 5.899466  | -1.443420 | 0.095575  |
| 6 | 0 | 4.688150  | -0.776640 | 0.039573  |
| 6 | 0 | -1.251829 | 2.187642  | -0.107041 |
| 7 | 0 | -0.321340 | 1.162319  | 0.027714  |
| 5 | 0 | -0.747696 | -0.189243 | 0.641475  |
| 7 | 0 | -2.300846 | -0.343639 | 0.259485  |
| 7 | 0 | -3.156727 | 0.751200  | 0.248156  |
| 6 | 0 | -2.609194 | 1.948097  | 0.050534  |
| 6 | 0 | -2.822785 | -1.535423 | 0.011216  |
| 6 | 0 | -4.173571 | -1.782270 | -0.221858 |
| 7 | 0 | -5.110973 | -0.760452 | -0.094361 |
| 5 | 0 | -4.731227 | 0.607449  | 0.509322  |
| 6 | 0 | -0.566793 | 3.391741  | -0.441251 |
| 6 | 0 | 0.775709  | 3.060141  | -0.501852 |
| 6 | 0 | 0.918242  | 1.675652  | -0.196312 |
| 6 | 0 | -4.839561 | -2.972014 | -0.611253 |
| 6 | 0 | -6.189309 | -2.630217 | -0.709884 |
| 6 | 0 | -6.330535 | -1.268687 | -0.374760 |
| 9 | 0 | -0.627327 | -0.180534 | 2.013780  |

|   |   |           |           |           |
|---|---|-----------|-----------|-----------|
| 9 | 0 | -0.086534 | -1.264596 | 0.065913  |
| 9 | 0 | -5.349617 | 1.655869  | -0.153400 |
| 9 | 0 | -4.975769 | 0.641433  | 1.866930  |
| 6 | 0 | -1.194293 | 4.725659  | -0.714821 |
| 6 | 0 | -4.207493 | -4.299908 | -0.902618 |
| 6 | 0 | -7.578964 | -0.451692 | -0.284224 |
| 7 | 0 | 8.337622  | -1.419354 | -0.027607 |
| 6 | 0 | 9.579180  | -0.666162 | -0.075555 |
| 6 | 0 | 8.377655  | -2.832285 | 0.310864  |
| 1 | 0 | 1.944830  | -0.190171 | 0.051512  |
| 1 | 0 | 3.487969  | 2.430020  | -0.404883 |
| 1 | 0 | 5.824023  | 2.371052  | -0.494017 |
| 1 | 0 | 7.965370  | 1.226771  | -0.397448 |
| 1 | 0 | 5.894300  | -2.512358 | 0.271702  |
| 1 | 0 | 3.776775  | -1.352005 | 0.173192  |
| 1 | 0 | -3.326721 | 2.757557  | 0.001870  |
| 1 | 0 | -2.097434 | -2.339259 | -0.008052 |
| 1 | 0 | 1.586171  | 3.731906  | -0.751490 |
| 1 | 0 | -7.002259 | -3.287689 | -0.991313 |
| 1 | 0 | -0.432552 | 5.509465  | -0.760150 |
| 1 | 0 | -1.913837 | 5.003766  | 0.064285  |
| 1 | 0 | -1.732771 | 4.730921  | -1.671115 |
| 1 | 0 | -4.933007 | -5.110005 | -0.779217 |
| 1 | 0 | -3.361574 | -4.506201 | -0.237415 |
| 1 | 0 | -3.831563 | -4.351645 | -1.933001 |
| 1 | 0 | -8.441213 | -1.034941 | -0.617632 |
| 1 | 0 | -7.502327 | 0.454704  | -0.892362 |
| 1 | 0 | -7.757853 | -0.128104 | 0.748616  |
| 1 | 0 | 10.420760 | -1.360366 | -0.050328 |
| 1 | 0 | 9.681594  | 0.028445  | 0.772118  |

|   |   |          |           |           |
|---|---|----------|-----------|-----------|
| 1 | 0 | 9.655545 | -0.083203 | -1.002335 |
| 1 | 0 | 9.411386 | -3.179866 | 0.272809  |
| 1 | 0 | 7.798615 | -3.429827 | -0.404626 |
| 1 | 0 | 7.984864 | -3.034048 | 1.318935  |

**3a-H<sup>+</sup>**

|   |   |           |           |           |
|---|---|-----------|-----------|-----------|
| 6 | 0 | 2.065164  | 0.932000  | -0.189110 |
| 6 | 0 | 3.334207  | 1.398513  | -0.292462 |
| 6 | 0 | 4.542749  | 0.595054  | -0.192121 |
| 6 | 0 | 5.800729  | 1.229505  | -0.307269 |
| 6 | 0 | 6.993728  | 0.524449  | -0.205597 |
| 6 | 0 | 6.939933  | -0.850585 | 0.015425  |
| 6 | 0 | 5.721165  | -1.518824 | 0.131727  |
| 6 | 0 | 4.537495  | -0.801577 | 0.027849  |
| 6 | 0 | -1.288300 | 2.212828  | -0.156089 |
| 7 | 0 | -0.356922 | 1.202595  | -0.038937 |
| 5 | 0 | -0.751920 | -0.175546 | 0.551778  |
| 7 | 0 | -2.301590 | -0.335763 | 0.213624  |
| 7 | 0 | -3.164850 | 0.750503  | 0.227847  |
| 6 | 0 | -2.653149 | 1.948970  | 0.034972  |
| 6 | 0 | -2.834193 | -1.536225 | -0.024637 |
| 6 | 0 | -4.180724 | -1.789817 | -0.212902 |
| 7 | 0 | -5.127193 | -0.775755 | -0.059178 |
| 5 | 0 | -4.746122 | 0.583488  | 0.556840  |
| 6 | 0 | -0.632991 | 3.429183  | -0.490149 |
| 6 | 0 | 0.719251  | 3.116020  | -0.564307 |
| 6 | 0 | 0.876995  | 1.738871  | -0.271021 |
| 6 | 0 | -4.852018 | -2.991808 | -0.583083 |
| 6 | 0 | -6.200929 | -2.662887 | -0.640803 |
| 6 | 0 | -6.346449 | -1.297427 | -0.300138 |

|   |   |           |           |           |
|---|---|-----------|-----------|-----------|
| 9 | 0 | -0.568018 | -0.199562 | 1.915248  |
| 9 | 0 | -0.081483 | -1.217253 | -0.078870 |
| 9 | 0 | -5.386861 | 1.639024  | -0.057558 |
| 9 | 0 | -4.899695 | 0.584893  | 1.921585  |
| 6 | 0 | -1.283021 | 4.755601  | -0.747007 |
| 6 | 0 | -4.216287 | -4.313316 | -0.889343 |
| 6 | 0 | -7.603046 | -0.501629 | -0.169509 |
| 7 | 0 | 8.195443  | -1.644510 | 0.141630  |
| 6 | 0 | 9.020356  | -1.255102 | 1.346928  |
| 6 | 0 | 9.021370  | -1.652014 | -1.123995 |
| 1 | 0 | 1.883586  | -0.125871 | -0.030351 |
| 1 | 0 | 3.496386  | 2.462701  | -0.449415 |
| 1 | 0 | 5.838008  | 2.301410  | -0.477075 |
| 1 | 0 | 7.937942  | 1.053619  | -0.297564 |
| 1 | 0 | 5.684124  | -2.593127 | 0.305205  |
| 1 | 0 | 3.598635  | -1.335013 | 0.124626  |
| 1 | 0 | -3.382647 | 2.749431  | 0.021222  |
| 1 | 0 | -2.105769 | -2.336019 | -0.075933 |
| 1 | 0 | 1.517106  | 3.802564  | -0.815039 |
| 1 | 0 | -7.016796 | -3.325747 | -0.898485 |
| 1 | 0 | -0.537590 | 5.555648  | -0.758257 |
| 1 | 0 | -2.023807 | 5.001997  | 0.022141  |
| 1 | 0 | -1.799424 | 4.771396  | -1.714947 |
| 1 | 0 | -3.785685 | -4.326727 | -1.898946 |
| 1 | 0 | -4.954537 | -5.118420 | -0.837120 |
| 1 | 0 | -3.410237 | -4.552052 | -0.186326 |
| 1 | 0 | -8.460371 | -1.080300 | -0.520831 |
| 1 | 0 | -7.539498 | 0.430753  | -0.737910 |
| 1 | 0 | -7.777934 | -0.226753 | 0.878220  |
| 1 | 0 | 7.895032  | -2.612405 | 0.297172  |

|   |   |          |           |           |
|---|---|----------|-----------|-----------|
| 1 | 0 | 9.867547 | -1.938544 | 1.429902  |
| 1 | 0 | 8.384055 | -1.315695 | 2.229856  |
| 1 | 0 | 9.372044 | -0.233051 | 1.209670  |
| 1 | 0 | 9.868754 | -2.326580 | -0.987650 |
| 1 | 0 | 9.373333 | -0.638476 | -1.313851 |
| 1 | 0 | 8.386052 | -1.986550 | -1.944104 |

## 2. NMR of 3a

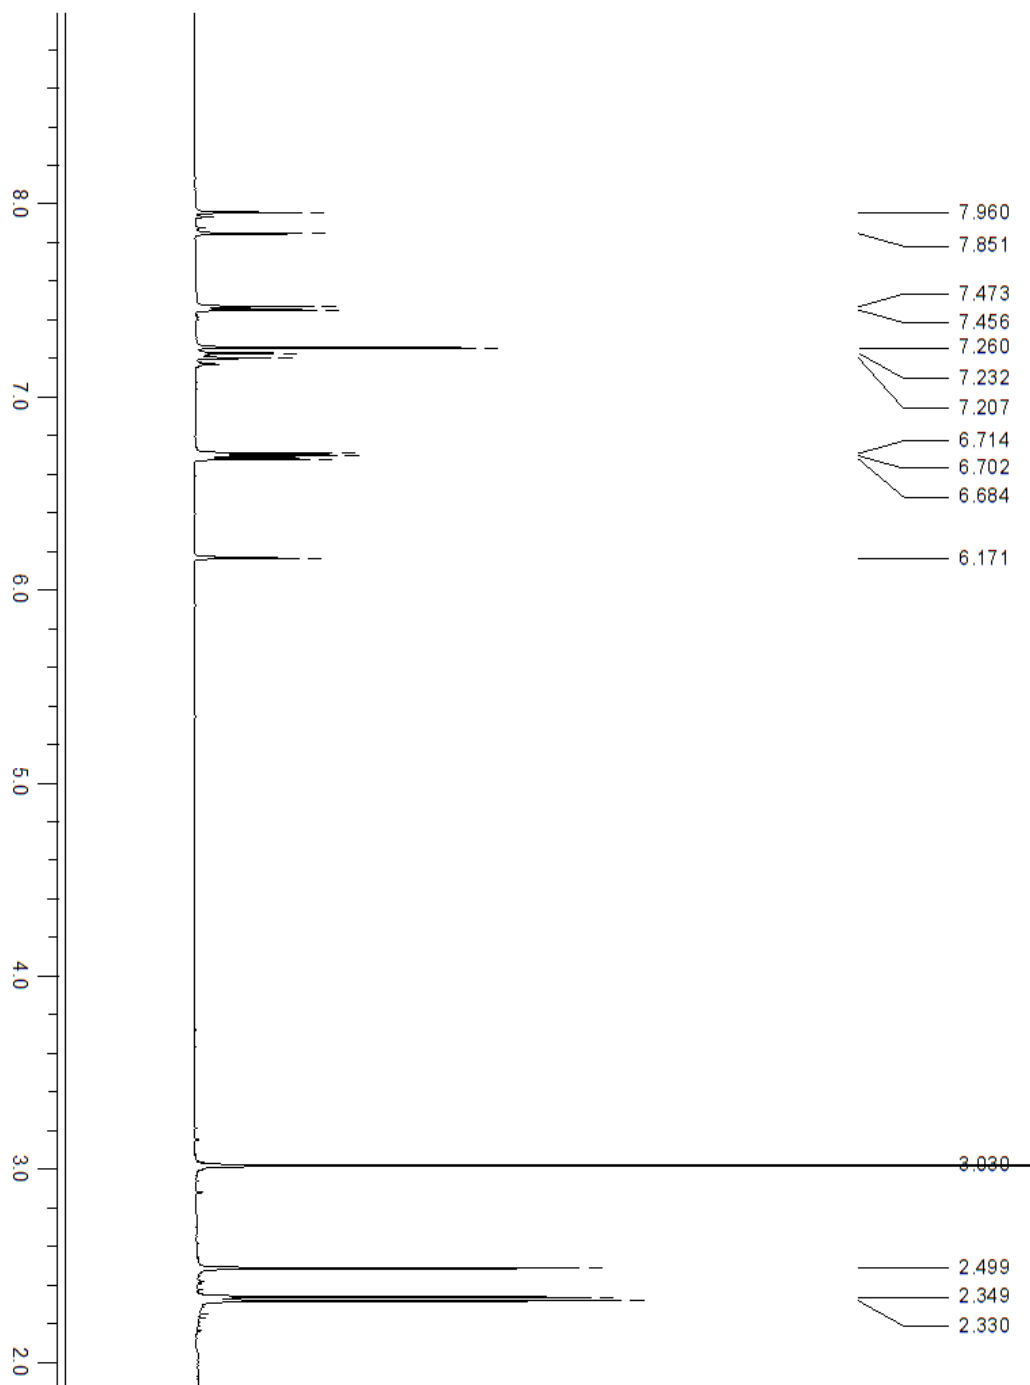

$^1\text{H}$  NMR of 3a

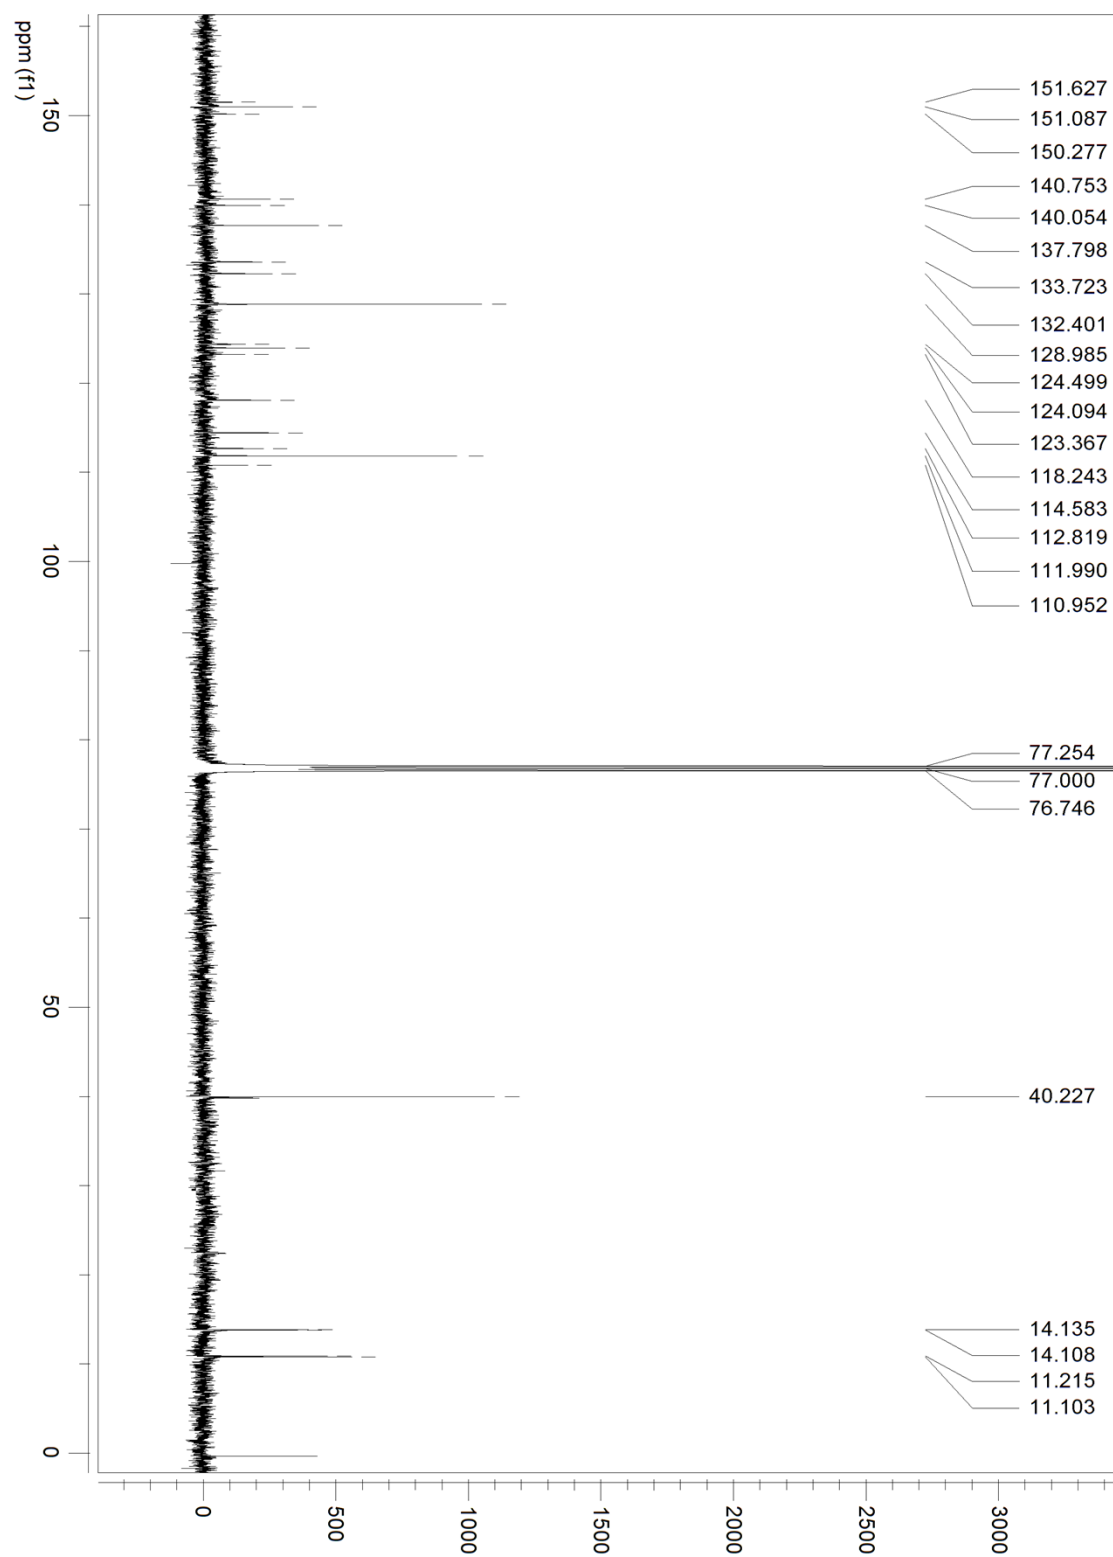

<sup>13</sup>C NMR of 3a
